# Supplementary material
Source: publisher figshare collection journal article supplement (https://acs.figshare.com/ndownloader/files/17597489)

## **Supporting information**

### **MhuD from *Mycobacterium tuberculosis* - probing a dual role in heme storage and degradation**

Sarah J. Matthews<sup>1</sup>, Kamila J. Pacholarz<sup>1</sup>, Aidan P. France<sup>1</sup>, Thomas A. Jowitt<sup>2</sup>, Sam Hay<sup>1</sup>, Perdita E. Barran<sup>1</sup>, Andrew W. Munro<sup>1\*</sup>

<sup>1</sup>Manchester Institute of Biotechnology, School of Chemistry, Faculty of Science and Engineering, The University of Manchester, 131 Princess Street, Manchester M1 7DN, UK. <sup>2</sup>The Biomolecular Analysis Facility, Faculty of Biology, Medicine and Health, The University of Manchester, Oxford Road, Manchester M13 9PT, UK.

\*Author for Correspondence: Prof. Andrew W. Munro. Email: Andrew.Munro@Manchester.ac.uk; Phone 0161 3065151.

#### Figures S1 – S7

|                                                                                                                                                                         |   |
|-------------------------------------------------------------------------------------------------------------------------------------------------------------------------|---|
| Figure S1. SDS-PAGE gel from a MhuD purification.....                                                                                                                   | 2 |
| Figure S2. Analysis of MhuD dimeric state using analytical ultracentrifugation (AUC) .....                                                                              | 3 |
| Figure S3. Absolute and deconvoluted nESI-MS spectra over various hemin concentrations. ....                                                                            | 4 |
| Figure S4. Collision cross section distributions ( <sup>tw</sup> CCSD <sub>N<sub>2</sub></sub> ) for apo- and heme-bound MhuD [M + 8H] <sup>8+</sup> charge states..... | 6 |
| Figure S5. Absolute IM-MS spectrum of 10 μM MhuD + 10 μM deuteroheme (+0.5% DMSO). ....                                                                                 | 7 |
| Figure S6. Absolute IM-MS spectrum showing heme species formed through aIM-MS analysis of 2-heme-bound MhuD ( <i>m/z</i> 2982).....                                     | 8 |
| Figure S7. Effect of heme-MhuD incubation times on nESI-MS spectra.....                                                                                                 | 9 |

**Figure S1. SDS-PAGE gel from a MhuD purification.**

Samples were run on a 4–20% SDS PAGE gel. Lane 1: protein ladder; lanes 2 & 3: MhuD following overnight incubation with TEV protease; lane 4: MhuD following reverse nickel column elution; lane 5: MhuD following gel filtration.

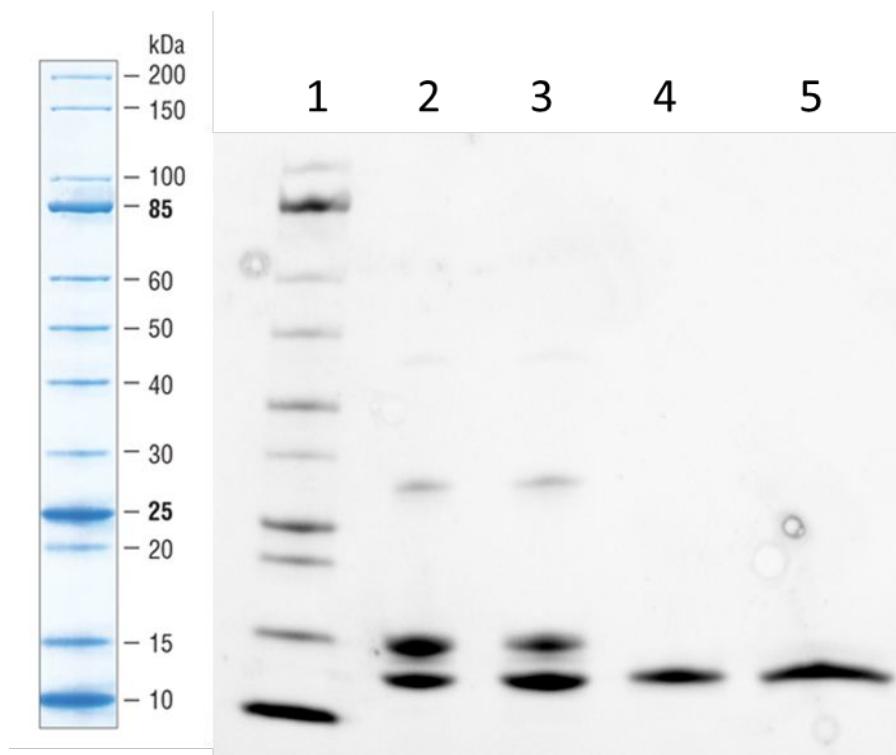

**Figure S2. Analysis of MhuD dimeric state using analytical ultracentrifugation (AUC).**

AUC experiments provided a sedimentation coefficient of  $\sim 2.08\text{S}$  and frictional ratio of  $f/f_0$  1.39 for MhuD, which correlates with an estimated molecular mass of 21 kDa and indicates that MhuD is dimeric in solution.

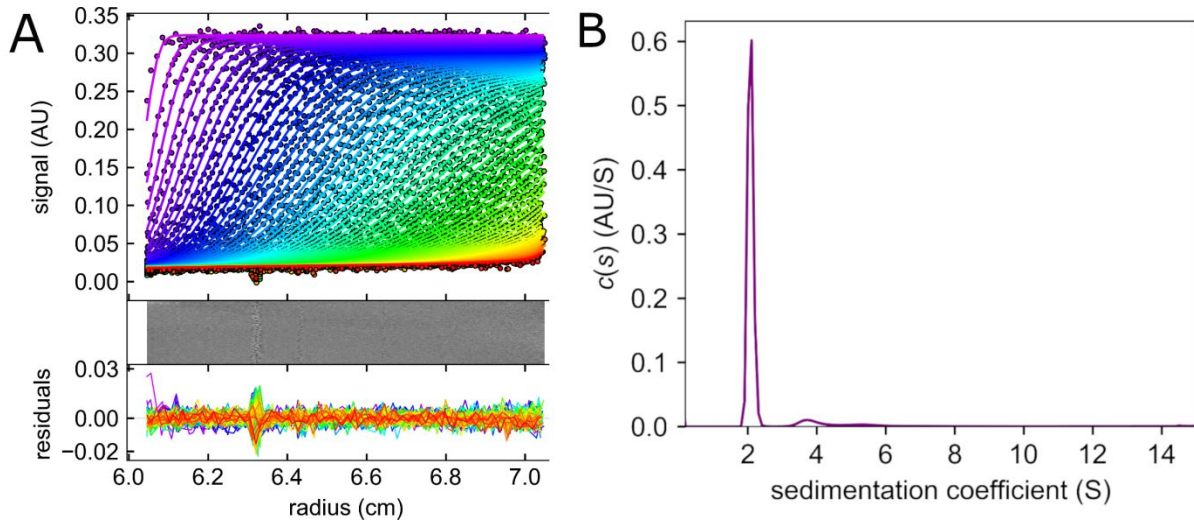

**Figure S3. Absolute and deconvoluted nESI-MS spectra over various heme concentrations.**

MhuD:heme stoichiometries are shown through **A)** absolute nESI-MS spectra (peaks labelled with respective charge states) and **B)** deconvoluted spectra. Samples contained 5  $\mu\text{M}$  MhuD in 100 mM ammonium acetate + 0.5% DMSO + 0, 2.5, 5, 10, 20, and 30  $\mu\text{M}$  heme (panels (i), (ii), (iii), (iv), (v) and (vi), respectively). Apo-, 1-, 2-, 3- and 4-heme bound forms of MhuD are represented by purple circles, blue triangles, cyan triangles, orange triangles and red squares, respectively.

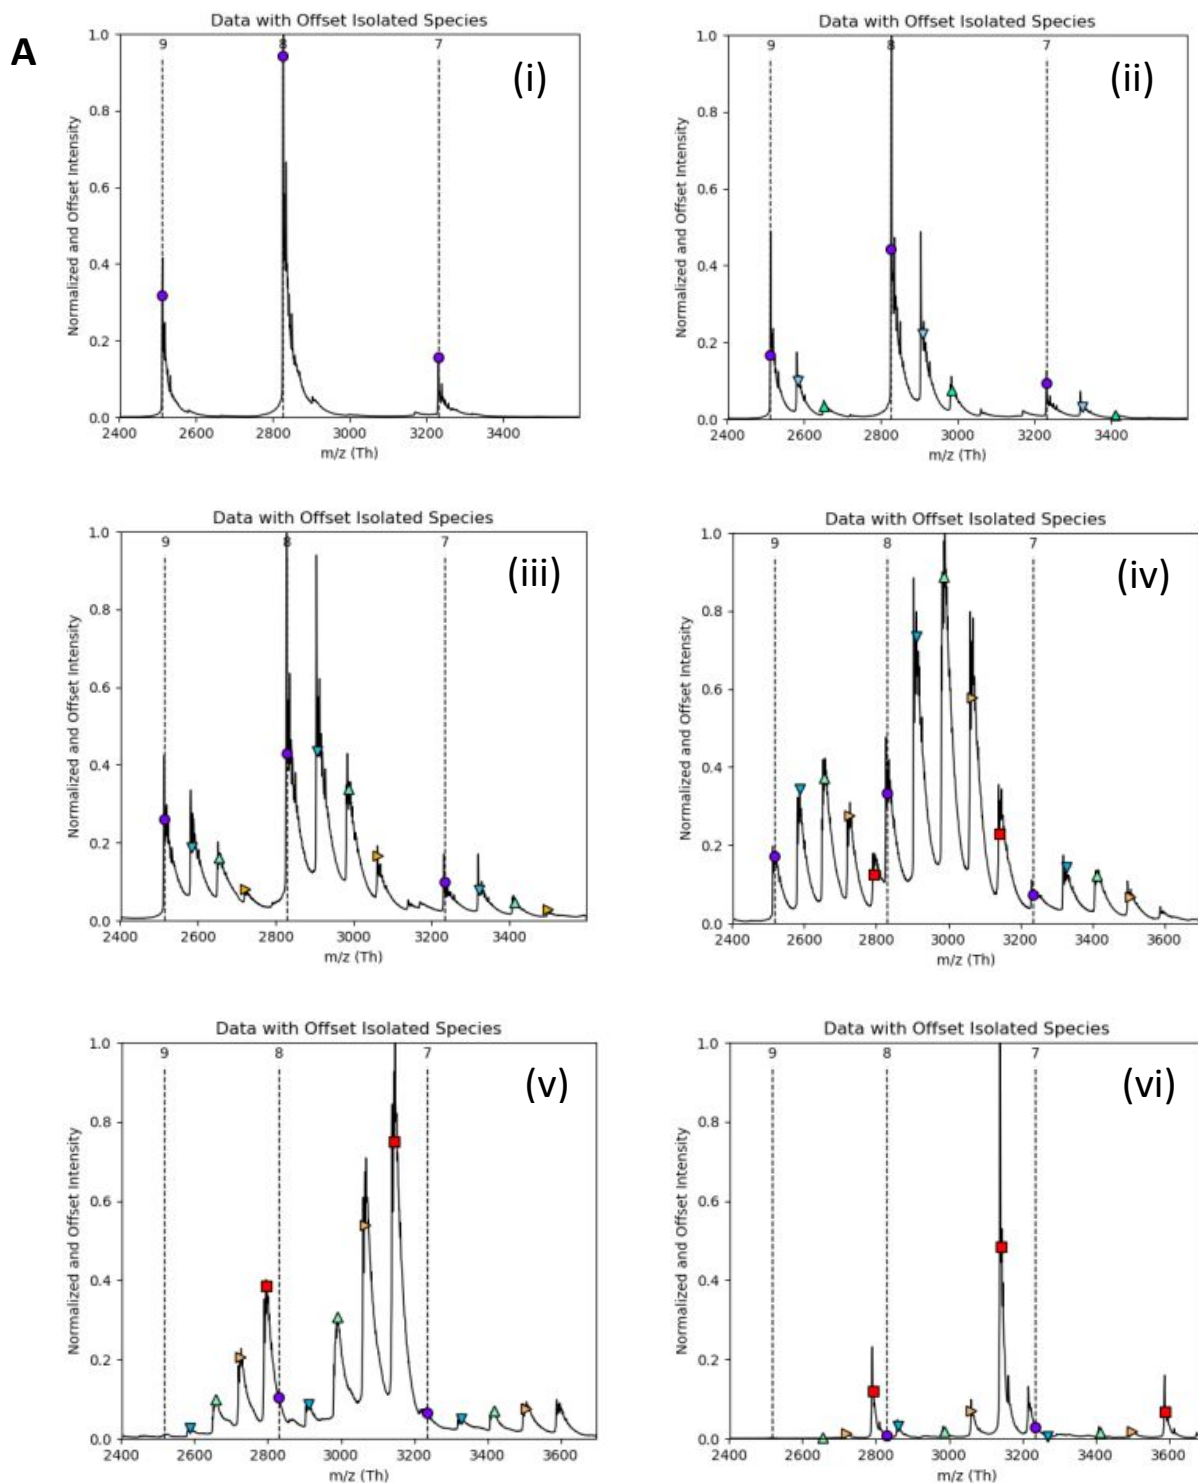

**B**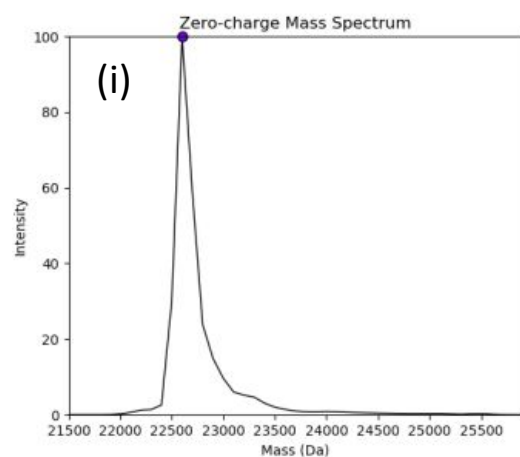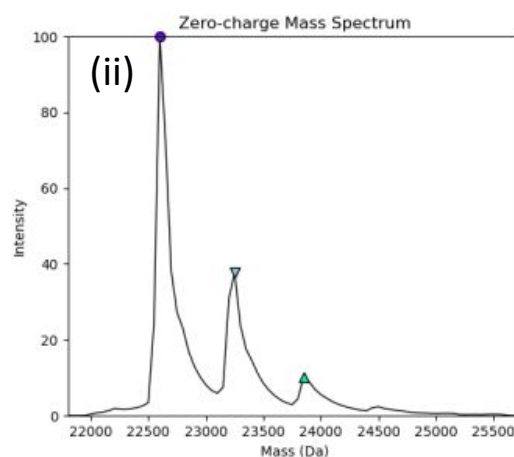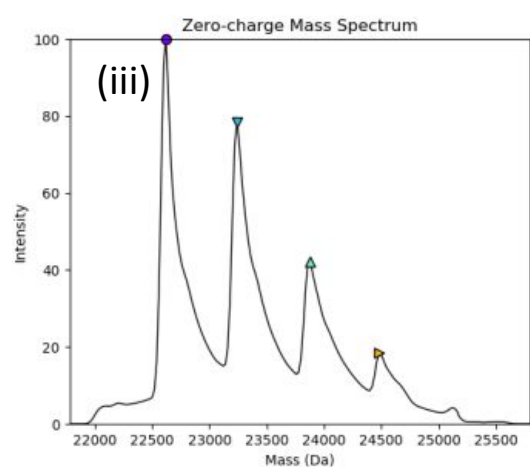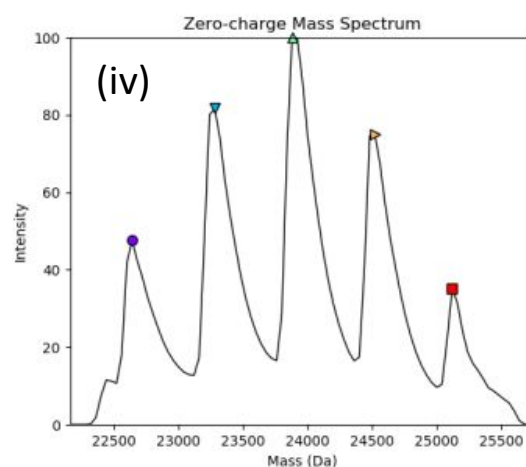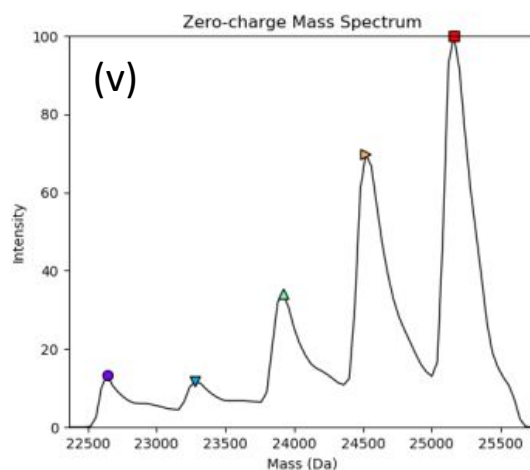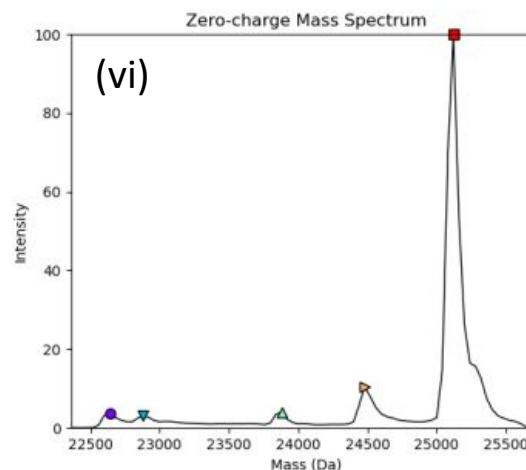

**Figure S4. Collision cross section distributions ( $^{TW}CCSD_{N_2}$ ) for apo- and heme-bound MhuD  $[M + 8H]^{8+}$  charge states.**

The figure shows minor, but consistent, increases in the  $^{TW}CCSD_{N_2}$  of MhuD as the number of bound heme molecules increases.

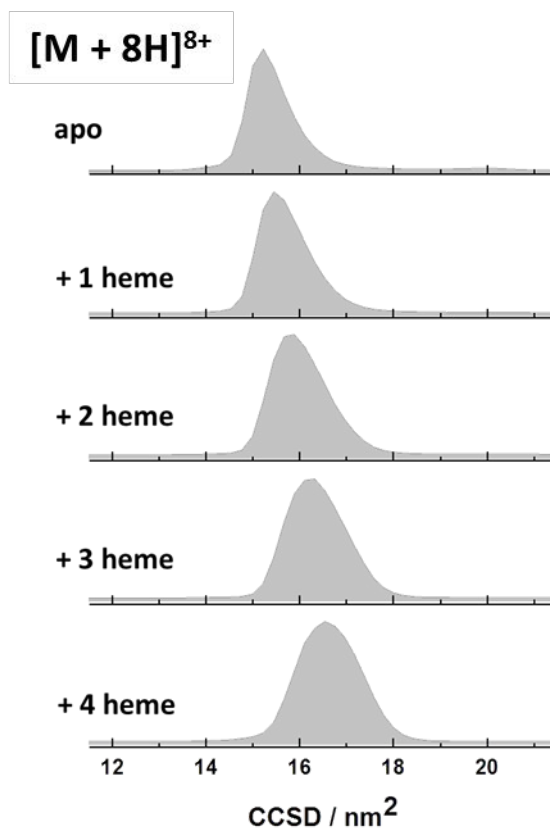

**Figure S5. Absolute IM-MS spectrum of 10  $\mu$ M MhuD + 10  $\mu$ M deuteroheme (+0.5% DMSO).**

This spectrum shows  $[M + 8H]^{8+}$  and  $[M + 9H]^{9+}$  charge species for apo, 1-, 2-, 3- and 4-deuteroheme bound MhuD (purple circles, blue triangles, cyan triangles, orange triangles and red squares, respectively).

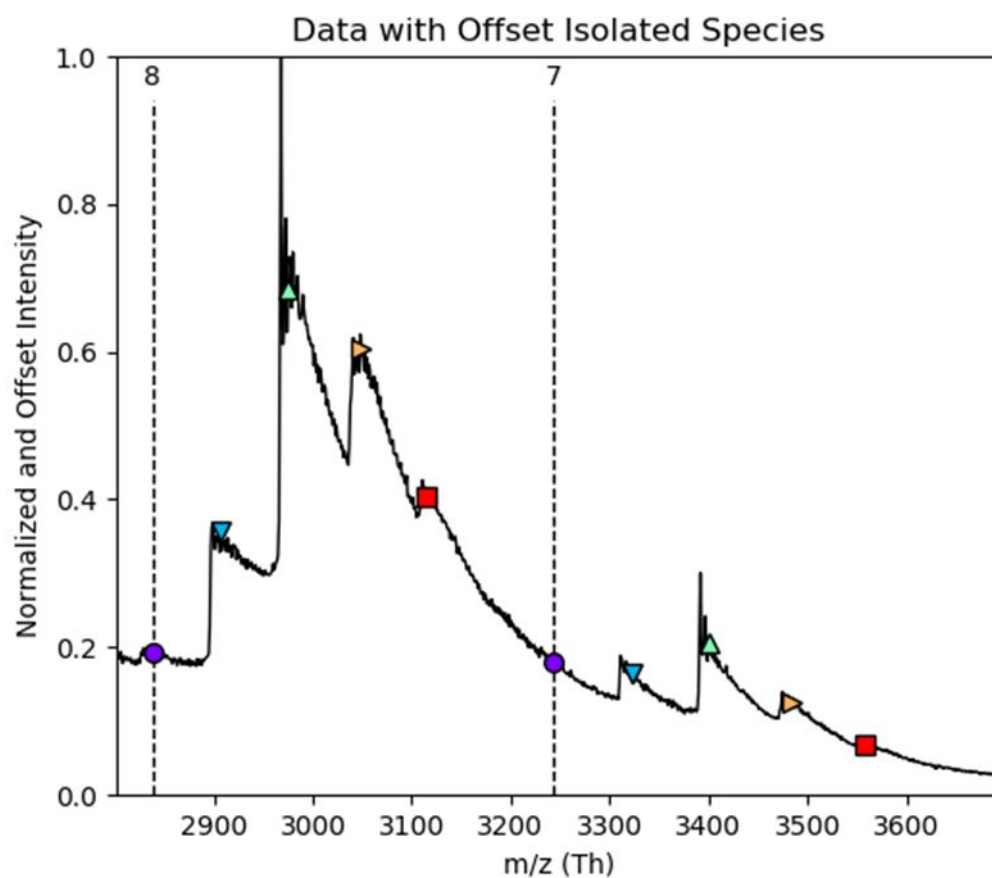

**Figure S6. Absolute IM-MS spectrum showing heme species formed through aIM-MS analysis of 2-heme bound MhuD ( $m/z$  2982)**

The spectrum shows monoheme ( $m/z$  616), diheme ( $m/z$  1232) and diheme + water ( $m/z$  1250) species that are formed during aIM-MS analysis of 2-, 3- and 4-heme bound forms of MhuD.

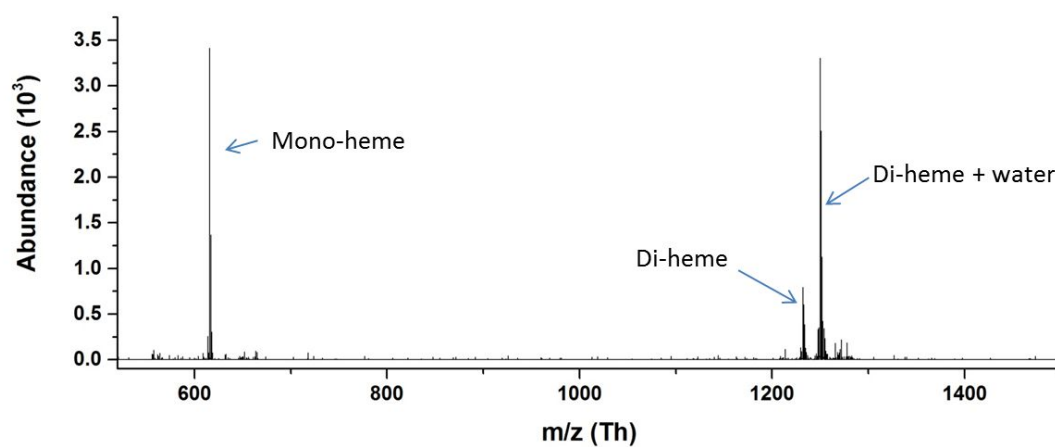



**Figure S7. Effect of heme-MhuD incubation times on nESI-MS spectra.**

Comparison of nESI-MS spectra when 5  $\mu$ M MhuD + 10  $\mu$ M heme (0.5% DMSO) are incubated at A) room temperature for 1 hour and B) 4°C overnight shows negligible differences in heme binding stoichiometry.

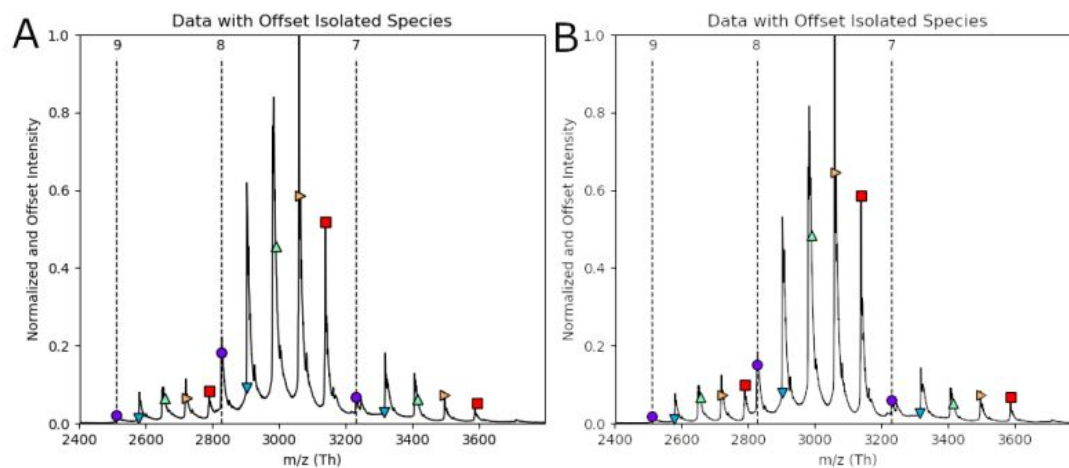

Supplement: Supplementary file 1 [file 17597489]
